# Supplementary material for: Intra-islet insulin synthesis defects are associated with endoplasmic reticulum stress and loss of beta cell identity in human diabetes
Source: PubMed Central journal article supplement (PMC9807540; doi:10.1007/s00125-022-05814-2), 2022-10-25
Supplement: 125_2022_5814_MOESM1_ESM.pdf [file 125_2022_5814_MOESM1_ESM.pdf]

## ELECTRONIC SUPPLEMENTARY MATERIAL (ESM)

### ESM METHODS

#### **Subjects and metabolic screening**

Eighteen patients [12 females; 6 males; mean age  $67.7 \pm 12.2$  (yrs.  $\pm$  S.D.)] undergoing pylorus-preserving pancreatoduodenectomy were recruited from January 2017 to July 2019 at the Digestive Surgery Unit and studied at the Centre for Endocrine and Metabolic Diseases unit (both at the Agostino Gemelli University Hospital, Rome, Italy). All underwent a complete metabolic screening including oral glucose tolerance test (OGTT) and mixed meal test (MMT) (ESM Methods). The study protocol (ClinicalTrials.gov Identifier: NCT02175459) was approved by the local ethics committee (P/656/CE2010 and 22573/14) (Rome, Italy) and all participants provided written informed consent, which was followed by a comprehensive medical evaluation.

*Oral Glucose Tolerance Test.* A standard 75 g oral glucose tolerance test was performed with measurement of glucose, insulin and C-peptide at 0, 30, 60, 90, 120 min after glucose load. Based on the pre-surgery OGTT results, we classified the patients according to the ADA classification (American Diabetes Association, 2019): subjects whose 2 h post glucose load was below 7.8 mmol/l were defined as normal glucose tolerant (NGT, n=5), subjects whose 2 h post glucose load was 7.8–10.9 mmol/l were defined as impaired glucose tolerant (IGT, n=9) and subjects whose 2 h post glucose load was higher than 11.1 mmol/l and with known history of type 2 diabetes of over two years and/or on anti-diabetic medications, were defined as diabetic (T2DM, n=4).

*Mixed meal test.* A mixed meal test was performed, as previously described [1, 2]. Patients were instructed to consume a meal of 830 kcal (107 kcal from protein, 353 kcal from fat, and 360 kcal from carbohydrates) within 15 min. Blood samples were drawn twice in the fasting state and at 30 min intervals over the following 240 min (sample time 0', 30', 60', 90', 120', 150', 180', 210' and 240') for the measurement of plasma glucose, insulin, C-peptide. Insulin levels were determined using a commercial RIA kit (Medical System, Immulite DPC, Los Angeles, CA). Plasma glucose concentrations were determined by the glucose oxidase technique, using a glucose analyser (Beckman Instruments, Palo Alto, CA, USA). Plasma C-peptide was measured by auto DELPHIA automatic fluoroimmunoassay (Wallac, Turku, Finland), with a detection limit of 17 pmol/L.

*Calculations.* During the OGTT and MMT, insulin secretion was derived from C-peptide levels by deconvolution. Beta-cell Glucose Sensitivity ( $\beta$ CGS), i.e., the slope of the relationship between insulin secretion and glucose concentration, was estimated from the OGTT or MMT by modelling, as previously described[3–5]. Matsuda index [6] was calculated as index of whole-body insulin sensitivity based on insulin and glucose values obtained from the OGTT.

### **Surgical procedures**

Indications for surgery were: periampullary tumours, pancreatic intraductal papillary tumours, mucinous cystic neoplasm of the pancreas, non-functional pancreatic neuroendocrine tumours. Only patients with normal cardiopulmonary and kidney function, as determined by medical history, physical examination, electrocardiography, estimated glomerular filtration rate, and urinalysis were included. Altered serum lipase and amylase levels prior to surgery, as well as morphologic criteria for pancreatitis, were considered exclusion criteria. Patients with severe obesity (BMI > 40), uncontrolled hypertension and/or diabetes (with HbA1c  $\geq$  58 mmol/mol (7.5%) and/or hypercholesterolemia were also excluded.

Pancreatoduodenectomy was performed according to the pylorus preserving technique. Briefly, the pancreatic head, the entire duodenum, common bile duct, and gallbladder were removed en-bloc, leaving a functioning pylorus intact at the gastric outlet. All adjacent lymph nodes were carefully removed. The continuity of the gastrointestinal tract was restored by an end-to-side pancreatojejunostomy. Further downstream, an end-to-side hepaticojejunostomy and an end-to-side pylorojejunostomy were performed. The volume of pancreas removed during the surgery is constant (~50%), as previously reported by Schrader et al. [2]. A pancreatic sample was collected during the surgery, from the downstream edge of the surgical cut. Pancreas samples were snap frozen in liquid nitrogen and then stored at -80 until analysis.

### **Proinsulin-Insulin immunofluorescence of human pancreatic sections and imaging analysis**

Frozen pancreatic 7  $\mu$ m thick tissue sections were used. After one hour of drying at room temperature (RT), the sections were fixed in paraformaldehyde (PFA) 4% in PBS for 20 minutes at RT. Sections were then washed three times in 0,1% PBS-tween w/  $\text{Ca}^{2+}$   $\text{Mg}^{2+}$  for 5 min at RT. To unmask the antigens, pancreatic sections were subjected to antigen retrieval using 10 mM citrate buffer pH 9.0 at 70°C for 40 minutes. Sections were washed three times in 0,1% PBS-tween w/  $\text{Ca}^{2+}$   $\text{Mg}^{2+}$  for 5 min at RT. Subsequently, sections were incubated with PBS 1X supplemented with 1% Bovine Serum Albumin (BSA, cat. A1470-25G, Sigma

Aldrich, St. Louis, MO, USA) to reduce non-specific reactions. Then, sections were incubated with primary antibodies, polyclonal Guinea Pig anti-human Insulin (cat. A0564 - Agilent Technologies, Santa Clara, CA, USA) diluted 1:2000 and Mouse monoclonal anti-human Proinsulin (cat. GS9A8–Developmental Study Hybridoma Bank, Iowa City, IA-USA (epitope: B-C junction of proinsulin spanning aa 26-37)[7–9] diluted 1:100 in PBS 1X supplemented with 1% BSA overnight in damp chamber at 4°C. The next day, sections were washed three times in 0,1% PBS-tween w/  $\text{Ca}^{2+}$   $\text{Mg}^{2+}$  5 min each at RT and subsequently incubated with secondary antibodies, goat anti-guinea pig Alexa-Fluor 488 conjugate (cat. A11073, Molecular Probe, Thermo Fisher Scientific, Waltham, MA, USA) diluted 1:500 in PBS 1X and goat anti-mouse Alexa-Fluor 594 conjugate (cat. A11032, Molecular Probe, Thermo Fisher Scientific, Waltham, MA, USA) diluted 1:500 in PBS 1X for 1h at RT. After the washes sections were counterstained with 4',6-Diamidino-2-phenylindole dihydrochloride (DAPI, cat. D8517, Sigma-Aldrich) diluted 1:3000 in PBS 1X for 5 minutes, and then mounted with Vectashield antifade medium (cat. H-1000, Vector Laboratories, Burlingame, CA, USA) and analysed immediately or stored at +4°C until ready for confocal microscope fluorescence image analysis.

Images were acquired as a single stack focal plane or in z-stack mode capturing multiple focal plane images. Sections were scanned and images acquired at 40x magnification. The same confocal microscope setting parameters (laser power, photomultiplier voltage gain and offset values, pinhole value) were applied to all stained sections before image acquisition to uniformly collect detected signal related to each fluorescence channel. Image analysis was performed using Volocity 6.3 software (Perkin Elmer, Waltham, MA, USA) on each individual islet to measure colocalization coefficient (M1), islet area ( $\mu\text{m}^2$ ), PI and INS positive area. The islet area ( $\mu\text{m}^2$ ) was calculated taking into consideration the value (sum area) which represents the total number of objects that identify the total area of islet on the basis of the region of interest (ROI). A background threshold filter was uniformly applied to all processed images before the evaluation of specific parameters. After setting manual thresholds based on the positivity of the signals to be analyzed, the PI and INS positive area was calculated. The PI/INS ratio was calculated by dividing the PI signal positive area and the INS positive area, normalized by the total area of islet.

The percentage of colocalization coefficient between PI and INS was calculated through the Colocalization Coefficient M1 (Mander's coefficient) that considers the percentage of pixels (or voxels in case of volume) of a given channel, in our case the INS, which overlaps to total pixels (or voxels) related to the other channel, in our case the PI. Of note, Mander's coefficient is independent of absolute signal as it measures the fraction of

one protein that colocalizes with a second protein where M represents the fraction (reported in percentage) of colocalizing pixels channel-1/channel-2 on total channel-1 pixels.

Pixel intensity distribution analysis was performed using Image J (v1.53c)(imagej.nih.gov) plot profile function on single fluorescence channel exported images.

### **Laser capture microdissection (LCM) of human pancreatic islets**

Pancreatic human tissue samples from n=5 NGT, n=9 IGT and n=4 T2D living donors (**Table 1**) were embedded in Tissue-Tek O.C.T. compound (Sakura Finetek Europe, The Netherlands) and immediately frozen in liquid nitrogen, then stored at -80°C. Then, 7 µm thick tissue sections were cut from frozen O.C.T. blocks using a cryostat (Leica CM1950UV). Sections were fixed in 70% ethanol for 30 s, dehydrated in 100% ethanol for 1 min, in 100% ethanol for 1 min, in xylene for 5 min and finally air-dried for 5 min. Laser capture microdissection (LCM) was performed using an Arcturus XT Laser-Capture Microdissection system (Arcturus Engineering, Mountain View, CA, USA) by melting thermoplastic films mounted on transparent LCM caps (cat. LCM0214 - ThermoFisher Scientific, Waltham, MA, USA) on specific islet areas. Human pancreatic islets were subsequently visualized through islet autofluorescence for LCM procedure. Thermoplastic films containing microdissected cells were incubated with 10 µl of extraction buffer (cat. kit0204 - ThermoFisher Scientific, Waltham, MA, USA) for 30 min at 42 °C and kept at -80°C until RNA extraction. Each microdissection was performed within 30 min from the staining procedure. Overall ~60 microdissected pancreatic islets from each case were analysed for the global molecular analysis.

### **Gene expression analysis of pooled and individual LCM pancreatic islets**

Total RNA was extracted from each LCM sample using PicoPure RNA isolation kit Arcturus (cat. kit0204 - ThermoFisher Scientific, Waltham, MA, USA) following manufacturer's procedure. Briefly, cellular extracts were mixed with 12.5 µl of Ethanol (100%) and transferred to the purification column filter membrane. DNase treatment was performed using RNase-Free DNase Set (cat. 79254 - Qiagen, Hilden, Germany). Total RNA was eluted in 11 µl of DNase/RNase-Free Water and LCM captures deriving from human sample were pooled and subjected to a subsequent concentration through Savant SpeedVac SC100 centrifugal evaporator. Agilent 2100 Bioanalyzer technology with RNA Pico chips (cat. 5067-1513 Agilent Technologies, Santa Clara, CA, USA) was performed for each RNA sample, to evaluate RNA Integrity Number (RIN) and concentration, by excluding samples with RIN<5.0.

To analyse gene expression associated with ER stress, folding, processing of proinsulin and beta-cell function and dysfunction, a reverse transcriptase reaction was performed on each RNA sample extracted (500 pg) from microdissected islet endocrine cells from each donor using SuperScript™ VILO™ cDNA Synthesis Kit (cat. 11754050- ThermoFisher Scientific, Waltham, MA, USA). cDNA deriving was then amplified using TaqMan PreAmp Master Mix (cat. 4488593, ThermoFisher Scientific, Waltham, MA, USA) following manufacturer's instructions. Real-Time PCR analysis was performed using TaqMan gene expression assays using the primers (see key resource table) and SensiFast Probe Lo-ROX Kit (cat.# BIO-84020, Biorun) following manufacturer's recommendation. Data were collected and analysed through Expression Suite software 1.0.1 (ThermoFisher Scientific, Waltham, MA, USA) using  $2^{-\Delta Ct}$  or  $2^{-\Delta\Delta Ct}$  method. Data analysis was performed using ViiA7™ RUO software to collect data and Expression Suite 2.1 software (both Thermo Fisher Scientific) to evaluate amplification plot efficiency and to export Ct values. Analysis was performed using  $2^{-\Delta Ct}$  following normalization with *ACTB* and *GAPDH*.

The phenotypic characterization of individual pancreatic islets was performed using two consecutive frozen pancreatic sections for each subject (**ESM Fig. 8**). In Section#1 we performed a PI-INS staining to characterize the morphological profile of each individual islet in order to evaluate the in-situ levels of PI and INS. After carrying out the image analysis as described above, we mapped the localisation and distribution of individual pancreatic islets by capturing low magnification images of the entire section. In Section#2 we isolated the previously mapped individual islets to analyse genes expression and to investigate putative molecular alterations associated with PI-INS expression and processing alterations. The laser capture microdissection procedure was performed as described above, isolating an individual islet at a time (**ESM Fig. 8**). Overall, we selected and evaluated 17 markers including 14 genes related to beta-cell phenotype and ER stress (*INS*, *NKX6.1*, *MAFA*, *CCT4*, *FOXO1*, *PCSK2*, *HRD1*, *ERO1B*, *CHGB*, *CPE*, *GRP78*, *PDIA1*, *XBPI*, *SEL1L*), and 3 individual in situ immunofluorescence PI and INS data (PI-INS Coloc. Coeff. M1, PI area and PI/INS area ratio) each individual microdissected pancreatic islet obtained from n=3 NGT, n=3 IGT and n=3 T2D individuals.

The whole eluate of RNA extracted from each individual microdissected islet (approximately 8.8 µl) using PicoPure RNA isolation kit (cat. kit0204 - ThermoFisher Scientific, Waltham, MA, USA), was subjected to a reverse transcriptase reaction using SuperScript™ VILO™ cDNA Synthesis Kit (cat. 11754050- ThermoFisher Scientific, Waltham, MA, USA) to analyse genes expression in individual pancreatic islets. The total volume of cDNA was then preamplified using TaqMan PreAmp Master Mix (cat. 4488593, ThermoFisher

Scientific, Waltham, MA, USA) by preparing the preamplification pool using selected TaqMan Gene expression assays by diluting each 20X TaqMan gene expression assays to obtain a final concentration of each assay equals to 0.5X. The preamplification product was diluted 1:5 in 0.1X Tris-EDTA pH 8.0. Real-Time PCR analysis was performed using TaqMan gene expression assays and SensiFast Probe Lo-ROX Kit (cat.# BIO-84020, Bioline) following manufacturer's recommendation.

## References

1. Muscogiuri G, Sorice GP, Mezza T, et al. (2013) High-normal TSH values in obesity: is it insulin resistance or adipose tissue's guilt? *Obesity (Silver Spring)* 21:101–106. doi: 10.1002/oby.20240
2. Schrader H, Menge BA, Breuer TGK, et al. (2009) Impaired glucose-induced glucagon suppression after partial pancreatectomy. *J Clin Endocrinol Metab* 94:2857–2863. doi: 10.1210/jc.2009-0826
3. Mari A, Schmitz O, Gastaldelli A, et al. (2002) Meal and oral glucose tests for assessment of beta -cell function: modeling analysis in normal subjects. *Am J Physiol Endocrinol Metab* 283:E1159–66. doi: 10.1152/ajpendo.00093.2002
4. Mari A, Tura A, Natali A, et al. (2010) Impaired beta cell glucose sensitivity rather than inadequate' compensation for insulin resistance is the dominant defect in glucose intolerance. *Diabetologia* 53:749–756. doi: 10.1007/s00125-009-1647-6
5. Mezza T, Sorice GP, Conte C, et al. (2016)  $\beta$ -Cell Glucose Sensitivity Is Linked to Insulin/Glucagon Bihormonal Cells in Nondiabetic Humans. *J Clin Endocrinol Metab* 101:470–475. doi: 10.1210/jc.2015-2802
6. Matsuda M, DeFronzo RA (1999) Insulin sensitivity indices obtained from oral glucose tolerance testing: comparison with the euglycemic insulin clamp. *Diabetes Care* 22:1462–1470. doi: 10.2337/diacare.22.9.1462
7. Asadi A, Bruin JE, Kieffer TJ (2015) Characterization of antibodies to products of proinsulin processing using immunofluorescence staining of pancreas in multiple species. *J Histochem Cytochem* 63:646–662. doi: 10.1369/0022155415576541
8. Madsen OD (1987) Proinsulin-specific monoclonal antibodies. Immunocytochemical application as beta-cell markers and as probes for conversion. *Diabetes* 36:1203–1211. doi: 10.2337/diab.36.10.1203
9. Rodriguez-Calvo T, Zapardiel-Gonzalo J, Amirian N, et al. (2017) Increase in Pancreatic Proinsulin and Preservation of  $\beta$ -Cell Mass in Autoantibody-Positive Donors Prior to Type 1 Diabetes Onset. *Diabetes* 66:1334–1345. doi: 10.2337/db16-1343

## ESM TABLES

**ESM Table 1.** Reagents and Resources Table

| REAGENT or RESOURCE                                                                  | SOURCE                   | IDENTIFIER                  |
|--------------------------------------------------------------------------------------|--------------------------|-----------------------------|
| <i>Antibodies and reagent for IHC</i>                                                |                          |                             |
| Polyclonal Guinea Pig Anti-Insulin                                                   | Agilent/Dako             | A0564,<br>RRID:AB_2617169   |
| Monoclonal Mouse Anti-Proinsulin                                                     | DSHB                     | GS9A8,<br>RRID:AB_532383    |
| Goat Anti-Mouse IgG (H+L) Highly Cross-adsorbed Antibody, Alexa Fluor 594 Conjugated | Thermo Fisher Scientific | A-11032,<br>RRID:AB_2534091 |
| Goat anti-Guinea Pig IgG (H+L) Highly Cross-Adsorbed Antibody, Alexa Fluor 488       | Thermo Fisher Scientific | A-11073,<br>RRID:AB_2534117 |
| Paraformaldehyde 4%                                                                  | Sigma Aldrich            |                             |
| DAKO PAP pen                                                                         | Agilent/Dako             | S2002                       |
| PBS w/o Ca <sup>2+</sup> Mg <sup>2+</sup>                                            | Gibco                    | 14040-091                   |
| Bovine Serum Albumin                                                                 | Sigma Aldrich            | A1470-25G                   |
| Vectashield                                                                          | Vector Laboratories      | H-1000                      |
| Dako Fluorescence Mounting Medium                                                    | Agilent/Dako             | S3023                       |
| DAPI                                                                                 | Sigma Aldrich            | D8517                       |
| Citrate buffer:                                                                      |                          |                             |
| 0.1 M Citric Acid Monohydrate                                                        | Sigma Aldrich            | C1909                       |
| 0.1M Sodium Citrate Tribasic Dihydrate                                               | Sigma Aldrich            | S4641                       |
|                                                                                      |                          |                             |
| <i>Chemicals</i>                                                                     |                          |                             |
| Absolute Ethanol                                                                     | VWR                      | 1.009.862.500               |
| Xilene                                                                               | Merck                    | 28975325                    |
| Hematoxylin                                                                          | Sigma Aldrich            | MHS31                       |
| PicoPure RNA isolation kit Arcturus                                                  | Thermo Fisher Scientific | kit0204                     |
| RNase-Free DNase Set                                                                 | Qiagen                   | 79254                       |
| Agilent 2100 Bioanalyzer technology with RNA Pico chips                              | Agilent Technologies     | 5067-1513                   |
| SuperScript <sup>™</sup> VILO <sup>™</sup> cDNA Synthesis Kit                        | Thermo Fisher Scientific | 11754050-                   |
| SensiFast Probe Lo-ROX Kit                                                           | Aurogene s.r.l           | BIO-84020                   |
| LCM caps                                                                             | Thermo Fisher Scientific | LCM0214                     |
| Direct-zol RNA Miniprep Kit                                                          | Zymo Research            | R202                        |
| Taq Man Preamp Master mix                                                            | Thermo Fisher Scientific | 4488593                     |
|                                                                                      |                          |                             |
| <i>TaqMan assays</i>                                                                 |                          |                             |
| Endogenous control human GAPDH                                                       | Thermo Fisher Scientific | 4333764                     |
| Endogenous control human ACTB                                                        | Thermo Fisher Scientific | 4333762                     |
| Endogenous control human B2M                                                         | Thermo Fisher Scientific | 4333766                     |
| Taq Man gene expression assay INS                                                    | Thermo Fisher Scientific | Hs02741908_m1               |
| Taq Man gene expression assay GCG                                                    | Thermo Fisher Scientific | Hs00174967_m1               |
| Taq Man gene expression assay STT                                                    | Thermo Fisher Scientific | Hs00174949_m1               |
| Taq Man gene expression assay PDX1                                                   | Thermo Fisher Scientific | Hs00236830_m1               |
| Taq Man gene expression assay FOXO1                                                  | Thermo Fisher Scientific | Hs01054576_m1               |

|                                                         |                          |               |
|---------------------------------------------------------|--------------------------|---------------|
| Taq Man gene expression assay MAFA                      | Thermo Fisher Scientific | Hs01651425_s1 |
| Taq Man gene expression assay NKX6.1                    | Thermo Fisher Scientific | Hs00232355_m1 |
| Taq Man gene expression assay SEL1L                     | Thermo Fisher Scientific | Hs01071406_m1 |
| Taq Man gene expression assay AMY2A                     | Thermo Fisher Scientific | Hs00420710_g1 |
| Taq Man gene expression assay HRD1/SYVN1                | Thermo Fisher Scientific | Hs00381211_m1 |
| Taq Man gene expression assay ABCC8                     | Thermo Fisher Scientific | Hs01093752_m1 |
| Taq Man gene expression assay ERP27                     | Thermo Fisher Scientific | Hs00929901_m1 |
| Taq Man gene expression assay UCN3                      | Thermo Fisher Scientific | Hs07289310_m1 |
| Taq Man gene expression assay SLC2A1                    | Thermo Fisher Scientific | Hs01096908_m1 |
| Taq Man gene expression assay ACLY                      | Thermo Fisher Scientific | Hs00982738_m1 |
| Taq Man gene expression assay IAPP                      | Thermo Fisher Scientific | Hs00169095_m1 |
| Taq Man gene expression assay PC1/PCSK1                 | Thermo Fisher Scientific | Hs01026107_m1 |
| Taq Man gene expression assay PC1/PCSK1                 | Thermo Fisher Scientific | Hs00159922_m1 |
| Taq Man gene expression assay CPE                       | Thermo Fisher Scientific | Hs00175676_m1 |
| Taq Man gene expression assay ERO1B                     | Thermo Fisher Scientific | Hs00219877_m1 |
| Taq Man gene expression assay DDIT3                     | Thermo Fisher Scientific | Hs01090850_m1 |
| Taq Man gene expression assay HSPA5                     | Thermo Fisher Scientific | Hs99999174_m1 |
| Taq Man gene expression assay XBP1                      | Thermo Fisher Scientific | Hs00231936_m1 |
| Taq Man gene expression assay EIF2AK3                   | Thermo Fisher Scientific | Hs00984003_m1 |
| Taq Man gene expression assay ERN1                      | Thermo Fisher Scientific | Hs00980095_m1 |
| Taq Man gene expression assay ATF6                      | Thermo Fisher Scientific | Hs00232586_m1 |
| Taq Man gene expression assay CHGB                      | Thermo Fisher Scientific | Hs01084631_m1 |
| Taq Man gene expression assay LMNB1                     | Thermo Fisher Scientific | Hs01059210_m1 |
| Taq Man gene expression assay P4HB                      | Thermo Fisher Scientific | Hs01050257_m1 |
| Taq Man gene expression assay TROVE2                    | Thermo Fisher Scientific | Hs01567394_m1 |
| Taq Man gene expression assay CCT4                      | Thermo Fisher Scientific | Hs00272345_m1 |
| Taq Man gene expression assay S100A9                    | Thermo Fisher Scientific | Hs00610058_m1 |
|                                                         |                          |               |
| <b>Software</b>                                         |                          |               |
| Expression Suite software 1.0.1                         | Thermo Fisher Scientific |               |
| Leica TCS SP5 confocal laser scanning microscope system | Leica Microsystems       |               |
| Laser Advanced fluorescence                             | Leica Microsystems       |               |
| Volocity 3D Image analysis Software                     | Perkin Elmer             |               |
| Graph Pad Prism 6 and 8                                 | Prism                    |               |



**ESM Table 2.** Table showing RNA integrity Number (RIN, scale 0-10) of total RNA extracted from pooled LCM islets captured from frozen pancreatic tissue sections of NGT, IGT and T2D subjects. In addition, type of analysis performed on each individual case is also reported (i.e. histology, pooled islet expression and/or individual islet expression analysis). Exclusively the samples with RIN  $\geq 5.0$  (highlighted in green) were considered for genes expression analysis of pooled islets, resulting in n=4 NGT, n=7 IGT and n=4 T2D for pooled islet gene expression analysis.

| <b>Case ID</b> | <b>RNA Integrity Number (RIN) [pooled islets]</b> | <b>Histological PI-INS in-Situ analysis</b> | <b><i>Pooled</i> islet genes expression analysis</b> | <b><i>Individual</i> islet genes expression analysis</b> |
|----------------|---------------------------------------------------|---------------------------------------------|------------------------------------------------------|----------------------------------------------------------|
| NGT 1          | 6.3                                               | YES                                         | YES                                                  | YES                                                      |
| NGT 2          | 1                                                 | YES                                         | NO                                                   | NO                                                       |
| NGT 3          | 7.1                                               | YES                                         | YES                                                  | YES                                                      |
| NGT 4          | 8                                                 | YES                                         | YES                                                  | NO                                                       |
| NGT 5          | 5.6                                               | YES                                         | YES                                                  | YES                                                      |
| IGT 1          | 7.4                                               | YES                                         | YES                                                  | YES                                                      |
| IGT 2          | 1                                                 | YES                                         | NO                                                   | NO                                                       |
| IGT 3          | 6                                                 | YES                                         | YES                                                  | NO                                                       |
| IGT 4          | 6.6                                               | YES                                         | YES                                                  | YES                                                      |
| IGT 5          | 5.5                                               | YES                                         | YES                                                  | NO                                                       |
| IGT 6          | 7.1                                               | YES                                         | YES                                                  | YES                                                      |
| IGT 7          | 5.1                                               | YES                                         | YES                                                  | NO                                                       |
| IGT 8          | 5.1                                               | YES                                         | YES                                                  | NO                                                       |
| IGT 9          | 1                                                 | YES                                         | NO                                                   | NO                                                       |
| T2D 1          | 5.1                                               | YES                                         | YES                                                  | NO                                                       |
| T2D 2          | 6.9                                               | YES                                         | YES                                                  | YES                                                      |
| T2D 3          | 7                                                 | YES                                         | YES                                                  | YES                                                      |
| T2D 4          | 5.1                                               | YES                                         | YES                                                  | YES                                                      |

**ESM Table 3. Quality control check on microdissected individual islet using RT-Real-Time PCR.** Raw Ct values of the exocrine marker *AMY2A* gene expression in comparison with islet-specific *INS* gene expression. Data are presented for each analysed individual islet included in the study (obtained from n=3 NGT, n=3 IGT and n=3 T2D).

| NGT subjects |            |                |              |
|--------------|------------|----------------|--------------|
|              | Islet code | AMY2A (raw Ct) | INS (raw Ct) |
| NGT-1        | 1a         | 40,0           | 13,6         |
|              | 2a         | 37,8           | 13,7         |
|              | 3a         | 40,0           | 14,4         |
|              | 4a         | 37,5           | 14,2         |
|              | 5a         | 32,7           | 14,4         |
|              | 6a         | 34,1           | 16,3         |
|              | 7a         | 36,6           | 15,0         |
|              | 8a         | 35,5           | 13,6         |
|              | 9a         | 40,0           | 15,9         |
|              | 10a        | 37,0           | 16,2         |
| NGT-2        | 1a         | 35,3           | 13,8         |
|              | 2a         | 37,2           | 16,2         |
|              | 3a         | 36,5           | 12,8         |
|              | 4a         | 38,1           | 14,6         |
|              | 5a         | 36,2           | 15,9         |
|              | 6a         | 35,9           | 14,8         |
|              | 1b         | 40,0           | 16,1         |
|              | 2b         | 40,0           | 19,2         |
|              | 3b         | 36,9           | 14,9         |
|              | 4b         | 36,4           | 16,8         |
|              | 5b         | 40,0           | 19,9         |
|              | 6b         | 40,0           | 17,2         |
| NGT-3        | 1a         | 40,0           | 15,3         |
|              | 2a         | 40,0           | 15,2         |
|              | 3a         | 40,0           | 16,3         |
|              | 4a         | 40,0           | 18,0         |
|              | 5a         | 40,0           | 14,1         |
|              | 6a         | 40,0           | 16,3         |
|              | 7a         | 40,0           | 15,1         |
|              | 8a         | 31,6           | 15,8         |
|              | 9a         | 40,0           | 13,6         |
|              | 10a        | 37,7           | 15,4         |
|              |            |                |              |
| IGT donors   |            |                |              |
|              | Islet code | AMY2A          | INS          |
| I            | 11a        | 34,3           | 12,6         |

|                   |                   |              |            |
|-------------------|-------------------|--------------|------------|
|                   | 12a               | 40,0         | 12,6       |
|                   | 13a               | 35,0         | 15,2       |
|                   | 14a               | 36,2         | 16,6       |
|                   | 15a               | 34,8         | 16,6       |
|                   | 17a               | 36,2         | 13,7       |
|                   | 18a               | 34,3         | 18,2       |
|                   |                   |              |            |
| IGT-2             | 7a                | 36,6         | 19,0       |
|                   | 8a                | 38,0         | 14,1       |
|                   | 9a                | 37,2         | 14,8       |
|                   | 10a               | 34,0         | 13,8       |
|                   | 11a               | 37,9         | 16,8       |
|                   | 12a               | 33,5         | 14,5       |
|                   | 7b                | 40,0         | 14,9       |
|                   | 8b                | 34,1         | 16,8       |
|                   | 9b                | 32,6         | 16,3       |
|                   | 10b               | 40,0         | 14,7       |
|                   | 11b               | 38,8         | 15,2       |
|                   | 12b               | 33,5         | 15,9       |
|                   |                   |              |            |
| IGT-3             | 11a               | 35,9         | 13,6       |
|                   | 12a               | 29,2         | 15,1       |
|                   | 13a               | 37,9         | 15,7       |
|                   | 14a               | 32,9         | 13,7       |
|                   | 15a               | 34,0         | 14,4       |
|                   | 16a               | 40,0         | 15,4       |
|                   | 17a               | 29,9         | 17,0       |
|                   | 18a               | 34,7         | 15,9       |
|                   | 19a               | 30,8         | 15,5       |
|                   | 20a               | 36,3         | 16,1       |
|                   | 21a               | 31,3         | 13,3       |
|                   |                   |              |            |
| <b>T2D donors</b> |                   |              |            |
|                   | <b>Islet code</b> | <b>AMY2A</b> | <b>INS</b> |
| T2D-1             | 19a               | 33,2         | 15,7       |
|                   | 20a               | 40,0         | 19,6       |
|                   | 21a               | 34,5         | 16,0       |
|                   | 22a               | 40,0         | 13,9       |
|                   | 23a               | 32,5         | 18,5       |
|                   | 24a               | 40,0         | 16,3       |
|                   | 25a               | 36,0         | 14,9       |
|                   | 26a               | 36,5         | 14,7       |
|                   | 27a               | 35,9         | 15,7       |
| 28a               | 34,3              | 15,4         |            |
|                   |                   |              |            |
| T2                | 13a               | 40,0         | 14,6       |
|                   | 14a               | 37,5         | 14,7       |

|              |     |      |      |
|--------------|-----|------|------|
|              | 15a | 35,3 | 14,6 |
|              | 17a | 30,6 | 16,7 |
|              | 13b | 32,4 | 22,0 |
|              | 14b | 40,0 | 15,3 |
|              | 15b | 40,0 | 15,6 |
|              | 16b | 38,2 | 15,3 |
|              | 17b | 36,8 | 13,8 |
|              | 18b | 40,0 | 16,5 |
|              |     |      |      |
| <b>T2D-3</b> | 22a | 40,0 | 14,2 |
|              | 23a | 36,9 | 17,5 |
|              | 24a | 32,4 | 15,3 |
|              | 25a | 33,0 | 14,7 |
|              | 26a | 36,8 | 17,3 |
|              | 27a | 36,3 | 15,6 |
|              | 28a | 30,4 | 13,5 |

**ESM Table 4.** List of selected genes reporting Official ID and gene names alongside their main biological processes.

| Official ID | Gene name                                                | Main biological process     |
|-------------|----------------------------------------------------------|-----------------------------|
| INS         | Insulin                                                  | Beta-cell function          |
| GCG         | Glucagon                                                 | Alpha cell function         |
| PDX1        | Pancreas/duodenum homeobox protein 1                     | Beta-cell differentiation   |
| FOXA2       | Forkhead box protein A2                                  | Beta-cell differentiation   |
| UCN3        | Urocortin-3                                              | Beta-cell differentiation   |
| FOXO1       | Forkhead box protein O1                                  | Beta-cell phenotype         |
| MAFA        | V-maf musculoaponeurotic fibrosarcoma oncogene homolog A | Beta-cell phenotype         |
| NKX6.1      | Homeobox protein NK-6 homolog A                          | Beta-cell phenotype         |
| PCSK1       | Prohormone convertase 1                                  | Proinsulin processing       |
| PCSK2       | Prohormone convertase 2                                  | Proinsulin processing       |
| CPE         | Carboxypeptidase E                                       | Proinsulin processing       |
| CHGB        | Chromogranin B                                           | Proinsulin processing       |
| GCK         | Glucokinase                                              | Beta-cell function          |
| SLC2A2      | Solute Carrier Family 2 Member 2                         | Beta-cell function          |
| ACLY        | ATP citrate lyase                                        | Beta-cell function          |
| IAPP        | Islet amyloid polypeptide                                | Beta-cell function          |
| ABCC8       | ATP Binding Cassette Subfamily C Member 8                | Beta-cell function          |
| S100A9      | S100 Calcium-Binding Protein A9                          | Inflammation                |
| CHGA        | Chromogranin-A                                           | Endocrine marker            |
| CRTC1       | CREB-regulated transcription coactivator 1               | Beta-cell proliferation     |
| ALDH1A3     | Aldehyde dehydrogenase family 1 member A3                | Beta-cell dedifferentiation |
| VIMENTIN    | Vimentin                                                 | Beta-cell dedifferentiation |
| CDH1        | Cadherin-1                                               | Cell adhesion               |
| CADM1       | Cell adhesion molecule 1                                 | Cell adhesion               |
| LMNB1       | Laminin B1                                               | Extracellular matrix        |
| GRP78       | Glucose-regulated protein                                | Adaptive-UPR                |
| XBP1        | Splicing of X-box binding protein 1                      | Adaptive-UPR                |
| PDIA1       | Protein disulfide isomerase                              | Adaptive-UPR                |
| ATF6        | Activating transcription factor 6                        | Adaptive-UPR                |
| ERP27       | Endoplasmic reticulum resident 27                        | ER stress and folding       |
| ERO1B       | ER oxidoreductin 1 $\beta$                               | ER stress and folding       |

|               |                                                  |                           |
|---------------|--------------------------------------------------|---------------------------|
| RO60          | RNA binding protein                              | ER stress and folding     |
| CCT4          | Chaperonin containing TCP1 subunit 4             | ER stress and folding     |
| PERK          | Pancreatic ER kinase                             | Adaptive and terminal UPR |
| IRE1 $\alpha$ | Inositol-requiring enzyme 1 $\alpha$             | Adaptive and terminal UPR |
| CHOP          | C/EBP homologous protein                         | Terminal-UPR              |
| SEL1L         | Protein sel-1 homolog 1                          | ER-associated degradation |
| HRD1          | ERAD-associated E3 ubiquitin-protein ligase HRD1 | ER-associated degradation |
| AMY2A         | Amylase alpha 2A (pancreatic)                    | Exocrine-specific marker  |

## ESM FIGURES

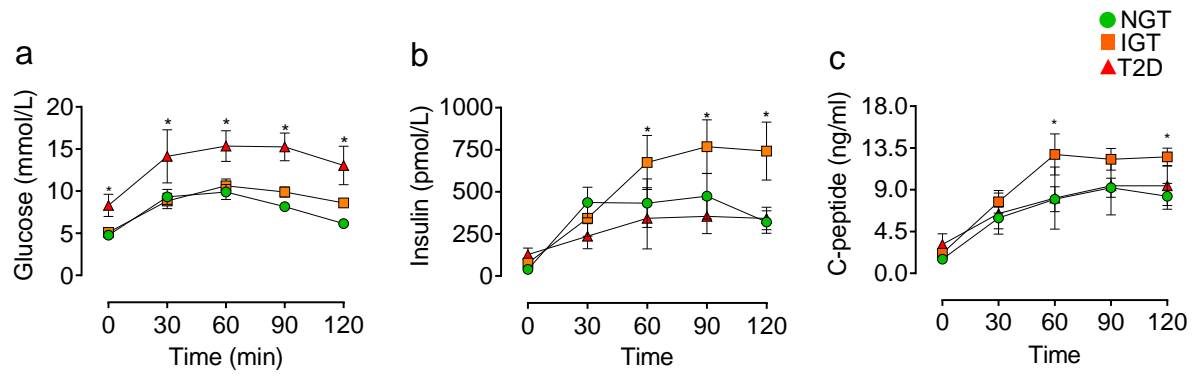

**ESM Figure 1.** (a) Glucose, (b) insulin, (c) C-peptide levels during OGTT before partial pancreatectomy in NGT (green circle), IGT (orange square) and T2D (red diamond).  $*p \leq 0.05$ , was considered statistically significant for glucose, insulin and C-peptide levels for each time point.

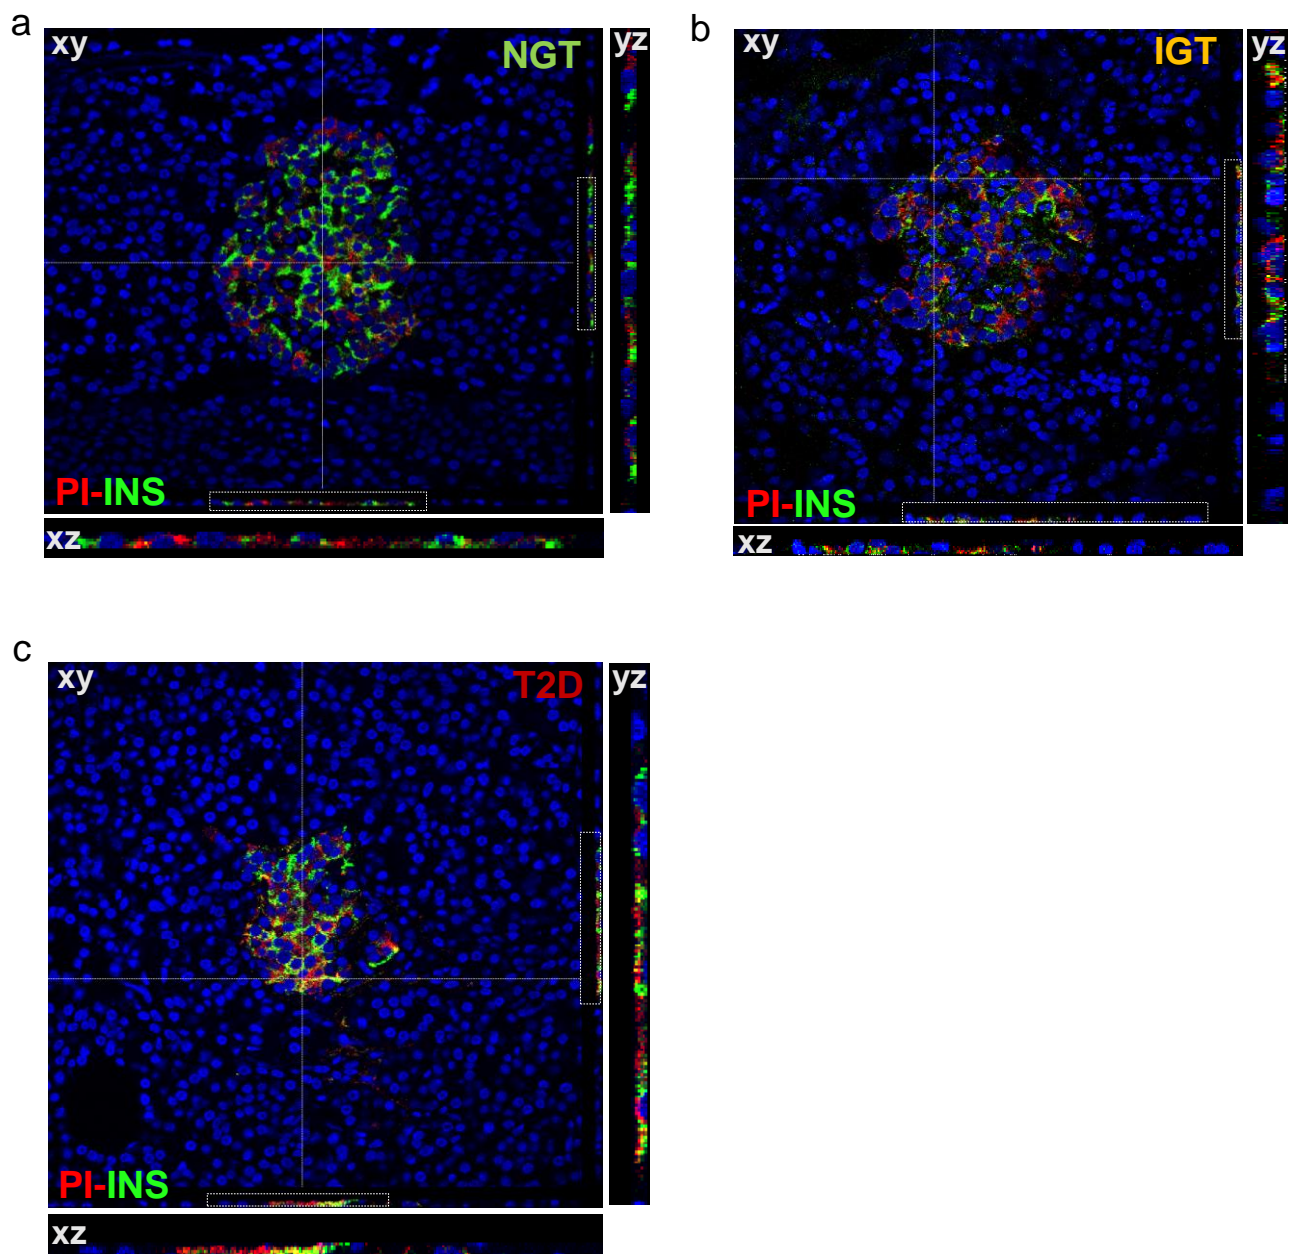

**ESM Figure 2.** (a-c) Representative z-stack 2D projection analysis of PI-INS immunofluorescence staining of human pancreatic tissue sections of NGT, IGT and T2D living donors. Images show the z-stack 2D projection (xy, xz, yz) of serial confocal planes (n=10) relative to the proinsulin (PI) and insulin (INS) immunofluorescence staining of pancreatic tissue sections of NGT (a), IGT (b) and T2D (c). Crosshair in xy images shows the location of xz and yz projections. Zoom-in of xz and yz projections are related to the white dotted rectangle in the main figure.



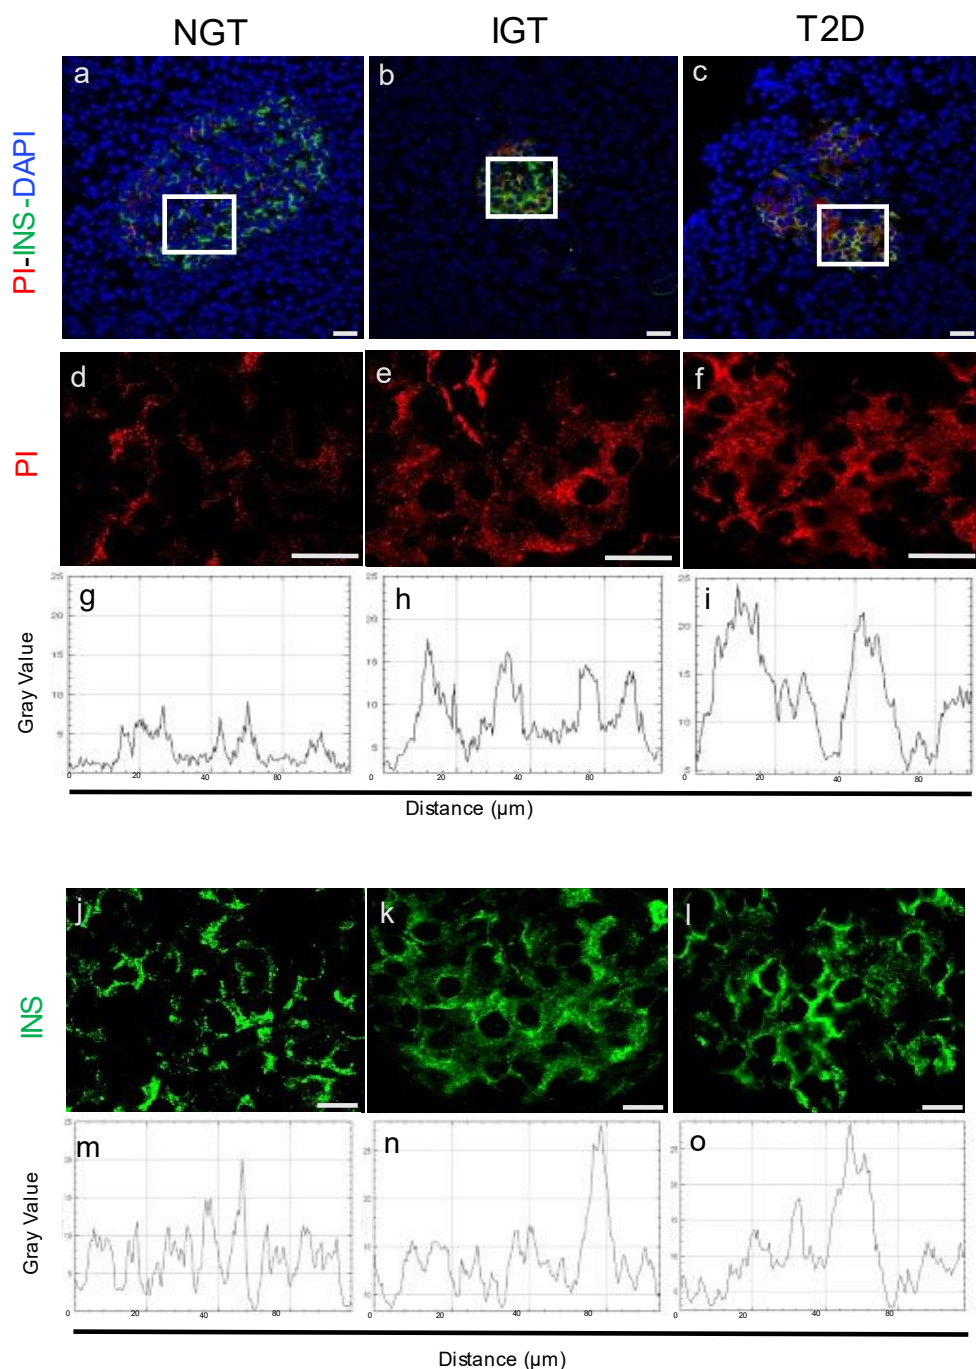

**ESM Figure 3.** Pixel intensity distribution analysis of PI and INS in representative pancreatic islets of NGT, IGT and T2D living donors. PI is increased while insulin remains unchanged from NGT to IGT to T2D. Panels a-c: images of islets stained for proinsulin (PI, red), insulin (INS, green), nuclei (blue) in NGT (panel a), IGT (panel b) and T2D (panel c) pancreatic tissues. White squares depict the zoom-in part of the image shown in panels d-f and in panels j-l. Panels d-f: representative zoom-in images of proinsulin staining (red) of NGT, IGT and T2D pancreatic sections shown in panels a-c. Panels g-i: two dimensional graphs reporting PI pixel intensities (gray scale values) across images of NGT (panel g), IGT (panel h) and T2D (panel i). Panels j-l: representative zoom-in images of insulin staining (green) of NGT, IGT and T2D pancreatic sections shown in panels a-c. Panels m-o: two dimensional graphs reporting insulin pixel intensities (gray scale values) across images of NGT (panel g), IGT (panel h) and T2D (panel i). Distances are shown in  $\mu\text{m}$ . Scale bars in panels a-c, in panels d-f and j-l are 20  $\mu\text{m}$ .

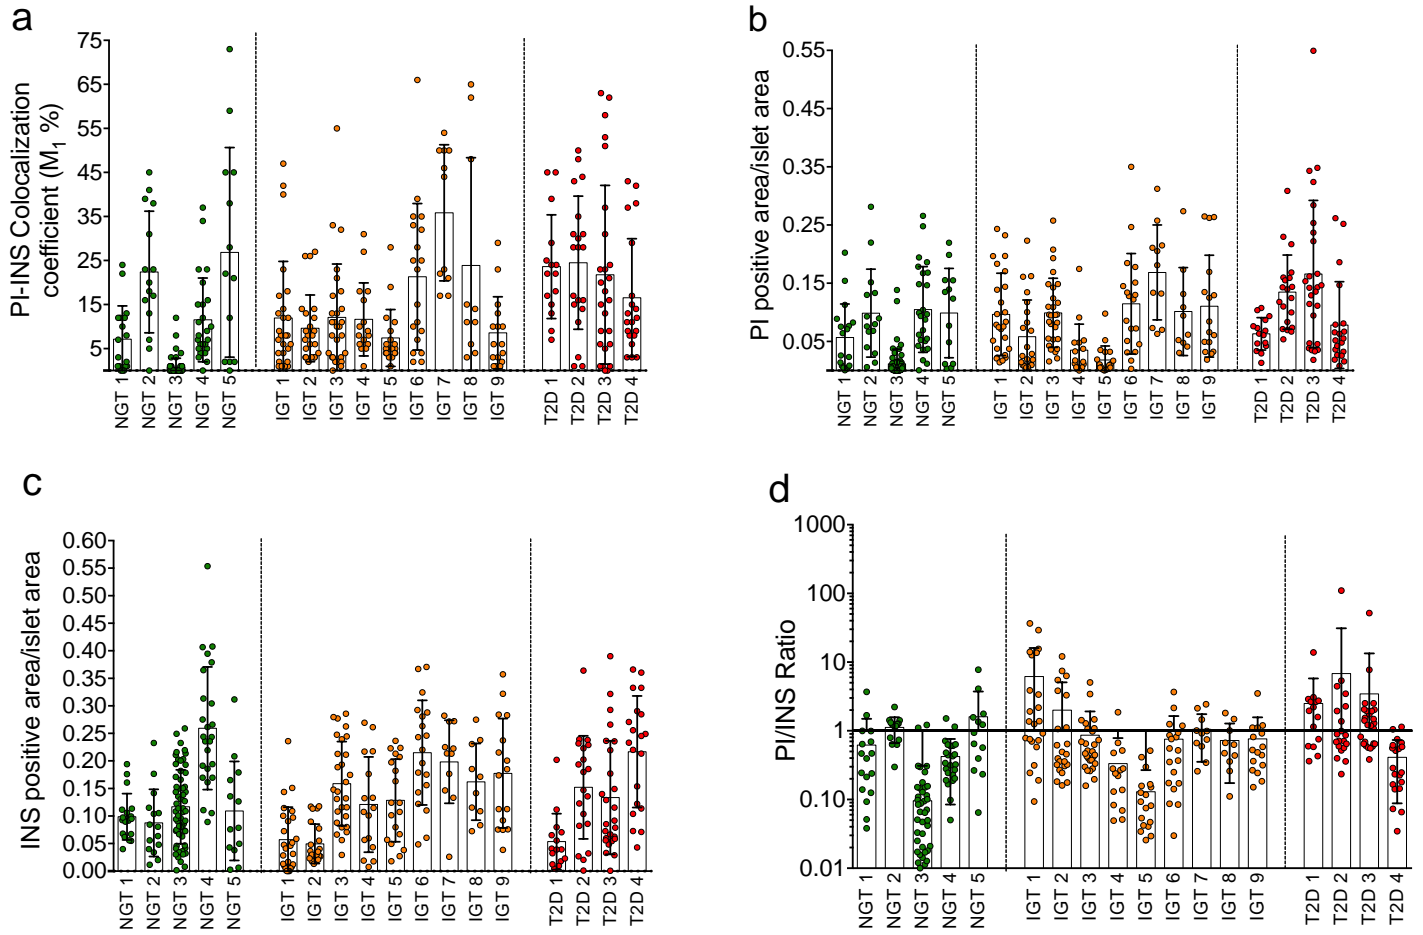

**ESM Figure 4.** Analysis of PI-INS immunofluorescence staining in pancreatic tissue sections of individual NGT (n=5), IGT(n=9) and T2D subjects (n=4). Bar plots showing PI positive area (**a**), INS positive area (**b**), PI-INS area ratio (**c**), PI-INS colocalization coefficient (**d**), of all cases analysed. Each dot represents an individual islet. Mean  $\pm$  S.E. values are reported for each case.

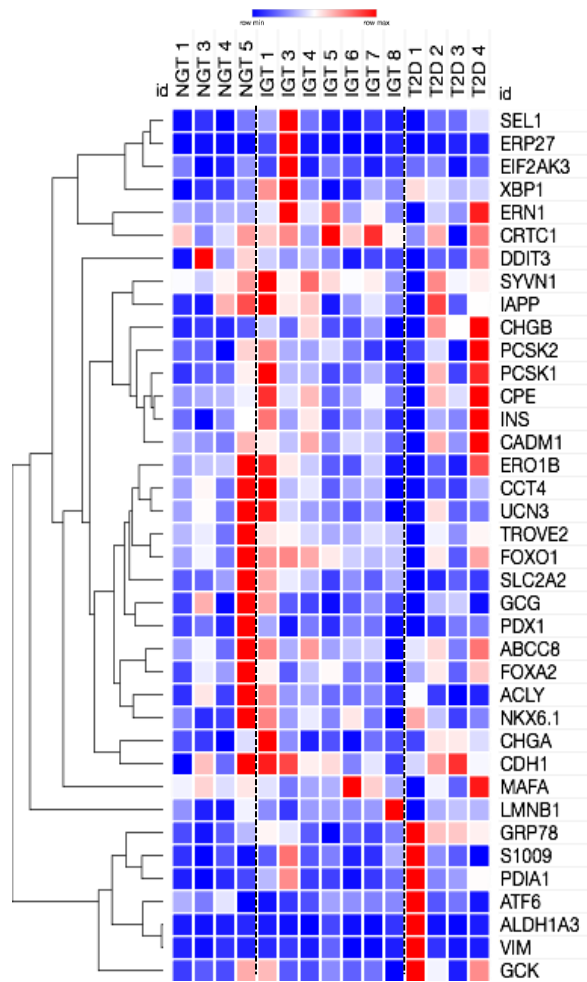

**ESM Figure 5.** Heatmap reporting the expression analysis of a selected list of genes involved in the ER stress and beta-cell function and phenotype in LCM-pancreatic islets from NGT, IGT and T2D living donors.

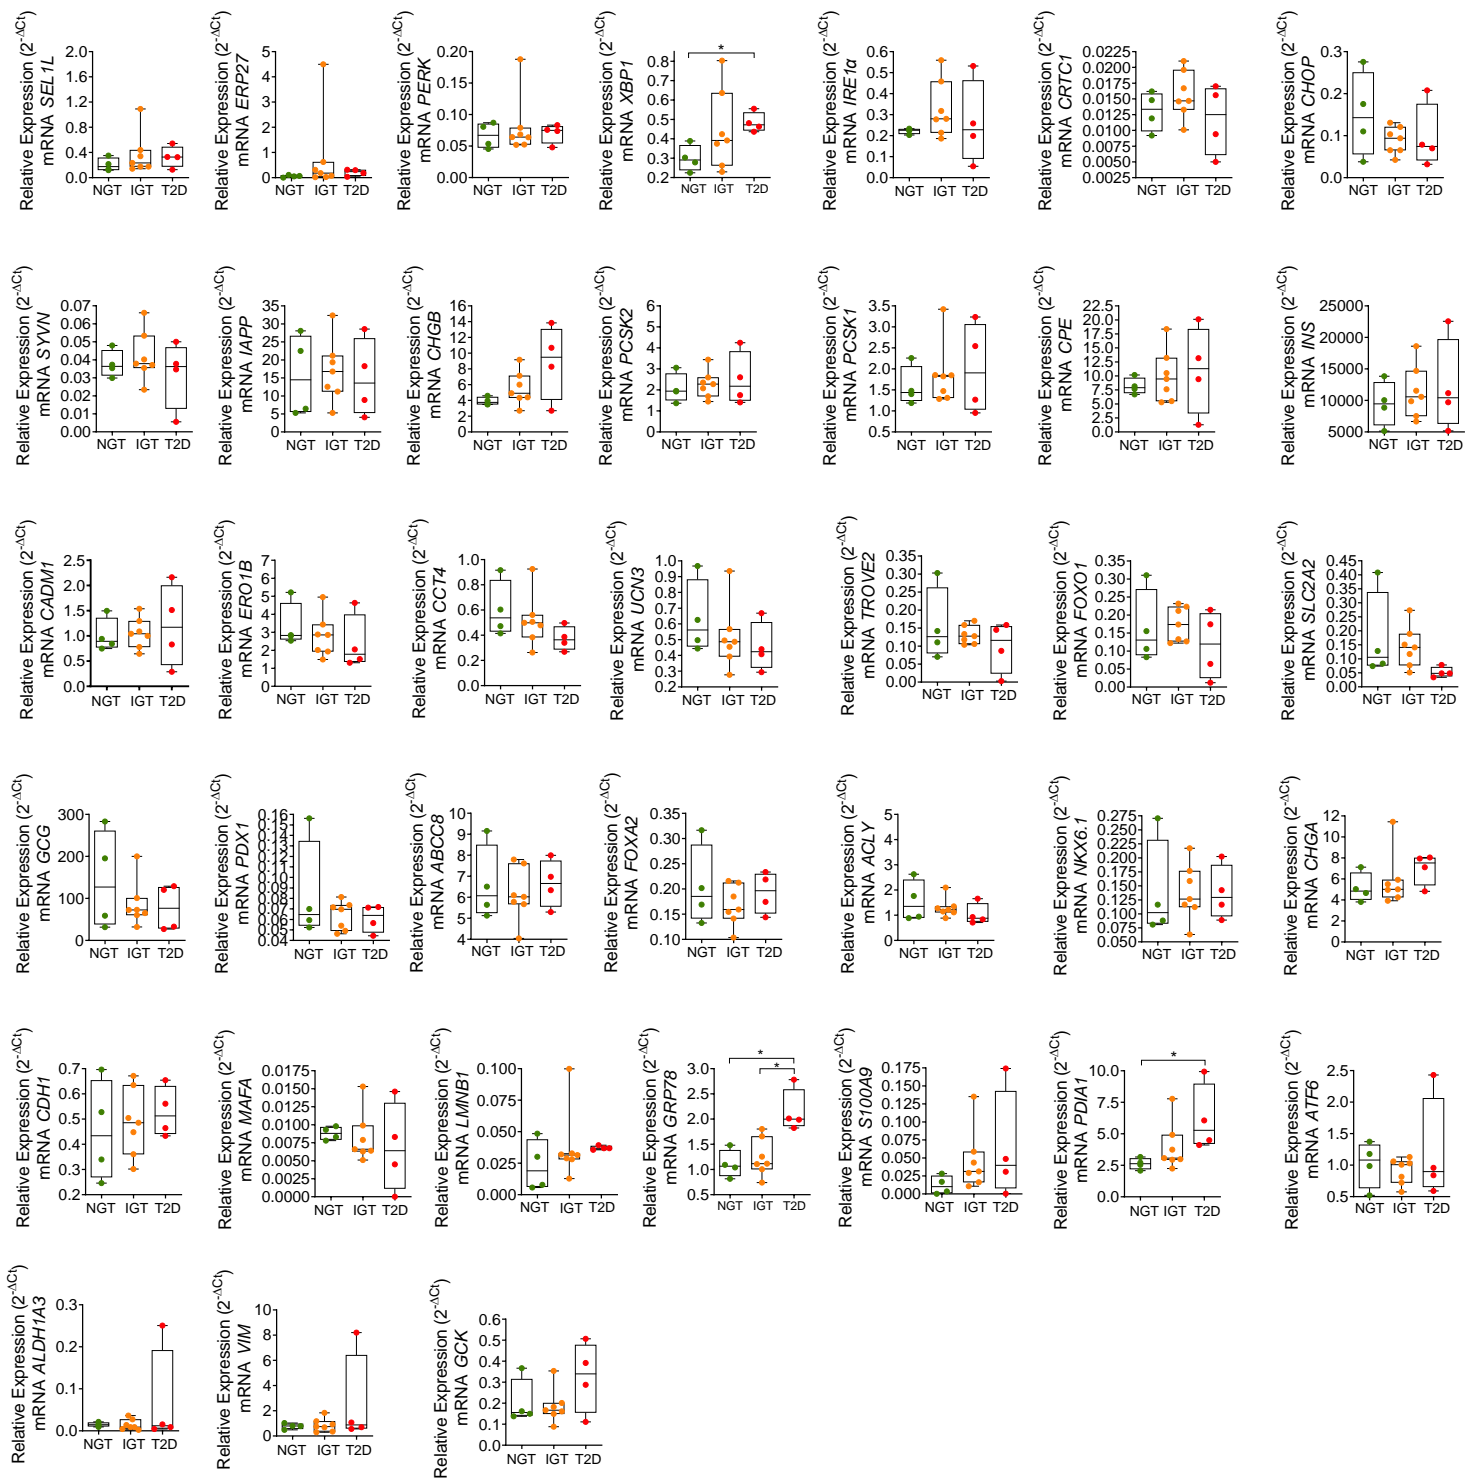

**ESM Figure 6.** Real-Time PCR gene expression analysis of pooled LCM pancreatic islets of NGT, IGT and T2D subjects reported in the hierarchical clustering analysis of ESM Figure 5. Box plot graphs show the expression of 38 genes associated with beta-cell function, ER stress/UPR pathways in microdissected pancreatic islets of n=4 NGT, n=7 IGT and n=4 T2D. Data are reported as  $2^{-\Delta C_T}$  values. Mean  $\pm$  S.D. values are reported. \* $p < 0.05$ , \*\* $p < 0.01$ , \*\*\* $p < 0.001$ , One-way ANOVA and Tukey's multiple comparisons post-test.

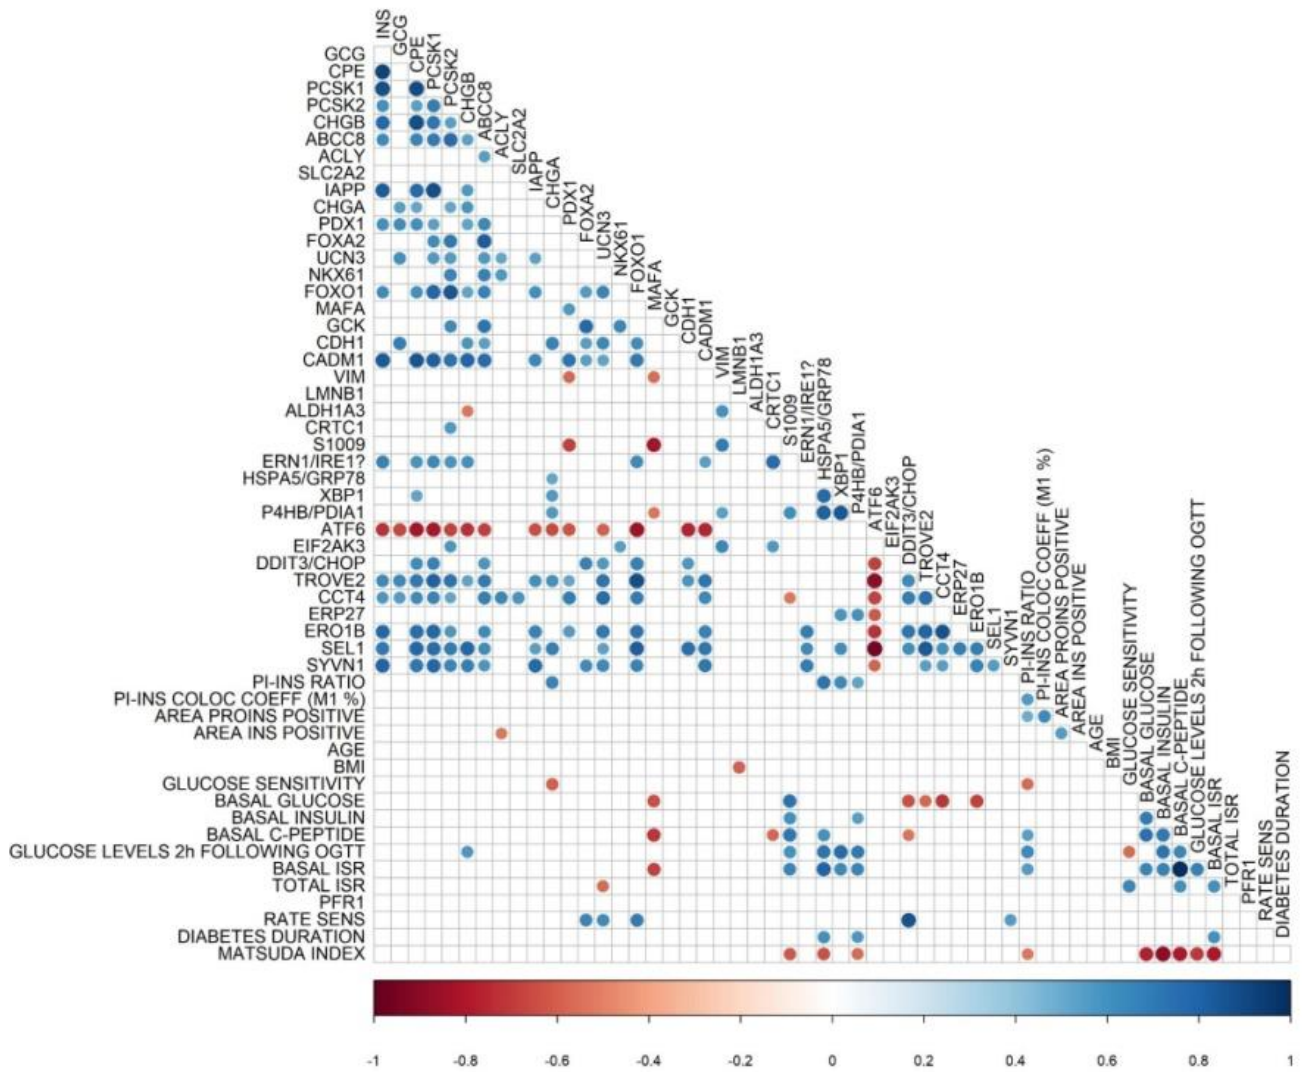

**ESM Figure 7.** Correlation matrix showing the  $r$ -values [scale colours from red (-1) to blue (1)] of significant correlations between gene expression levels, in situ PI-INS imaging parameters and clinical outcomes in NGT, IGT and T2D living donors. Correlations were performed using the Spearman R-test, taking into account  $p \leq 0.05$ . The statistical significance of the Spearman  $r$  test is indicated with the presence and size of coloured dots.

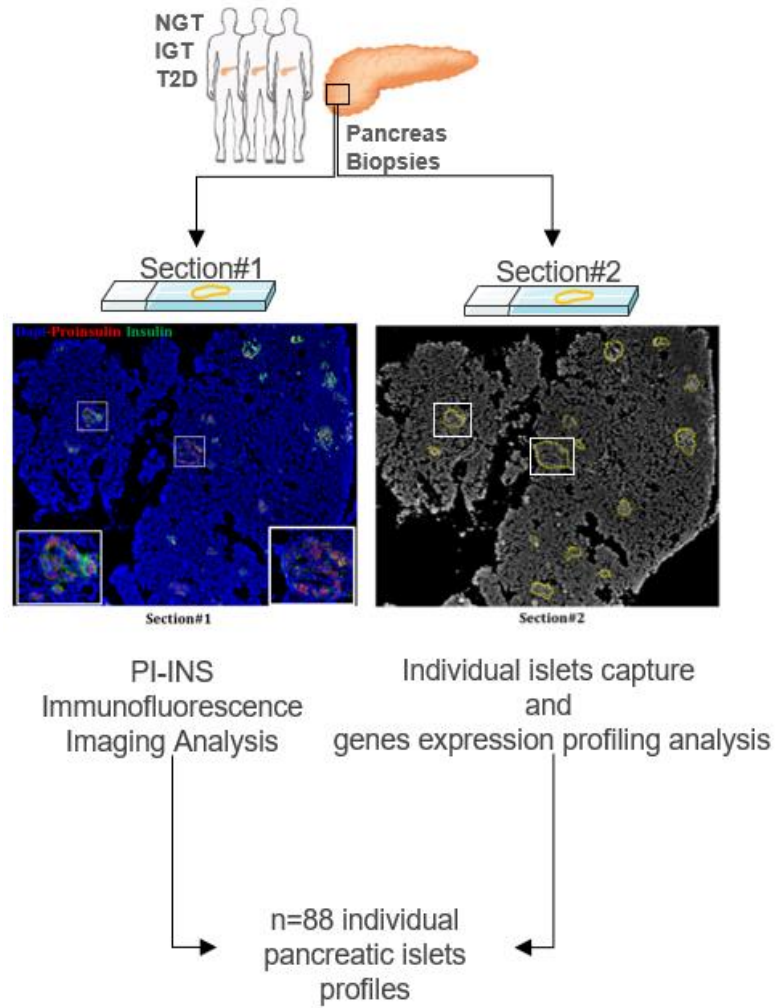

**ESM Figure 8. Individual human islet phenotyping reveals a direct association between proinsulin processing, ER stress and loss of beta-cell identity during in-vivo metabolic alterations.** Workflow diagram of individual islet phenotype from consecutive serial pancreatic sections of NGT, IGT and T2D patients. A total of 88 different individual pancreatic islets were profiled by molecular and immunofluorescence analysis.

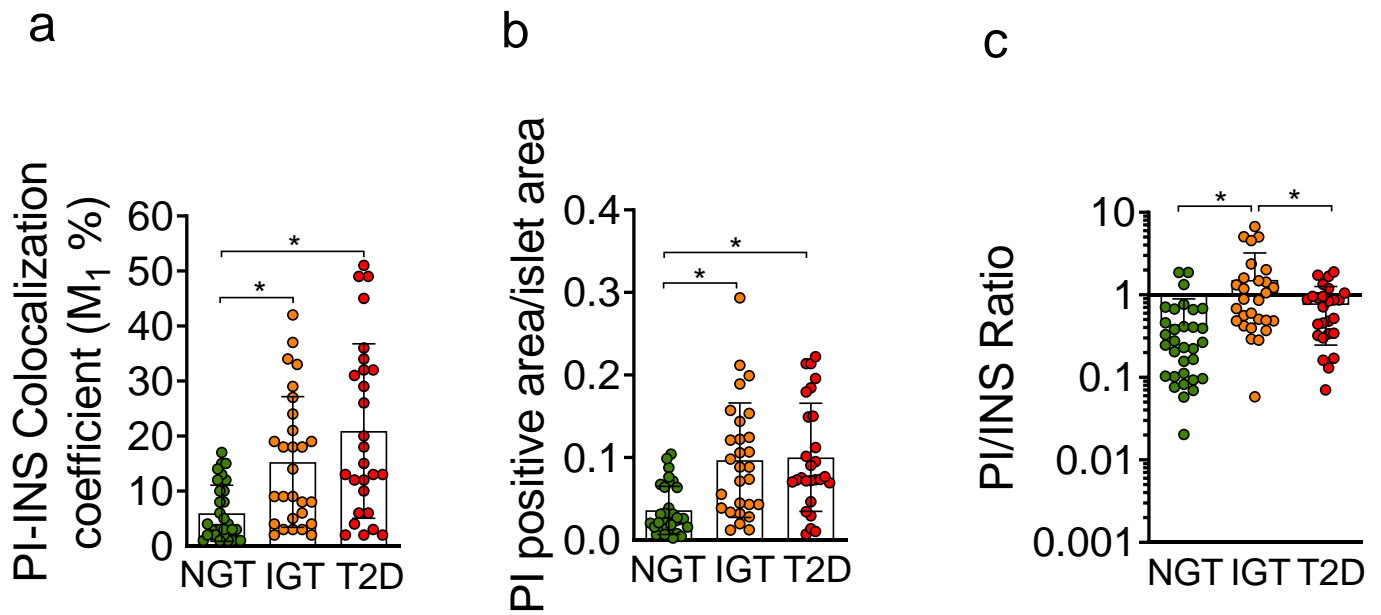

**ESM Figure 9.** Individual pancreatic islets PI-INS immunofluorescence analysis parameters. **(a-c)** Bar graphs showing immunofluorescence analysis parameters: PI-INS colocalization coefficient  $M_1$  **(a)**, PI positive area/islet area **(b)**, and the PI-INS area ratio **(c)**, in individual mapped pancreatic islets from  $n=3$  NGT,  $n=3$  IGT and  $n=3$  T2D patients.  $*p<0.05$ ,  $**p<0.01$ ,  $***p<0.001$ , One-way ANOVA and Tukey's multiple comparisons post-test. Data are presented as individual values for each pancreatic islet alongside mean  $\pm$  S.D.

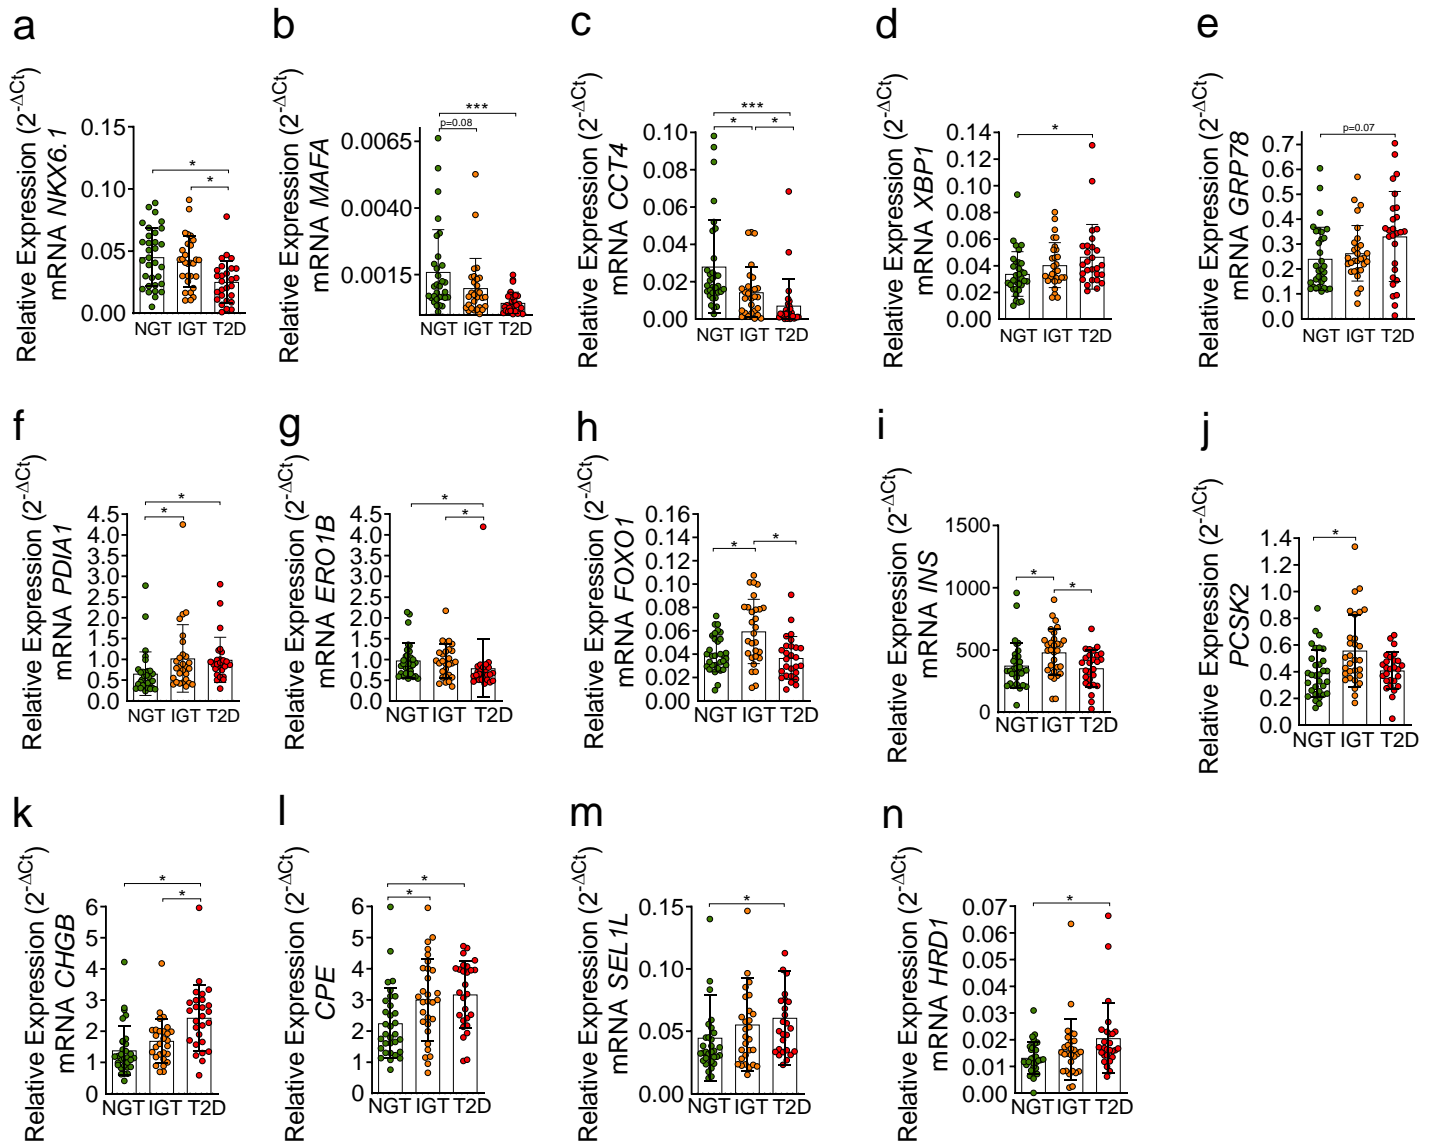

**ESM Figure 10.** (A-N) Bar charts showing the expression of *NKX6.1* (a), *MAFA* (b), *CCT4* (c), *XBP1* (d), *GRP78* (e), *PDIA1* (f), *ERO1B* (g), *FOXO1* (h), *INS* (i), *PCSK2* (j), *CHGB* (k), *CPE* (l), *SEL1L* (m) and *HRD1* (n), evaluated through RT-Real-Time PCR in n=32 individual NGT, n=29 IGT and n=28 individual islets of T2D subjects isolated with LCM. \* $p < 0.05$ , \*\* $p < 0.01$ , \*\*\* $p < 0.001$ , Kruskal Wallis with Dunn's multiple comparison test.



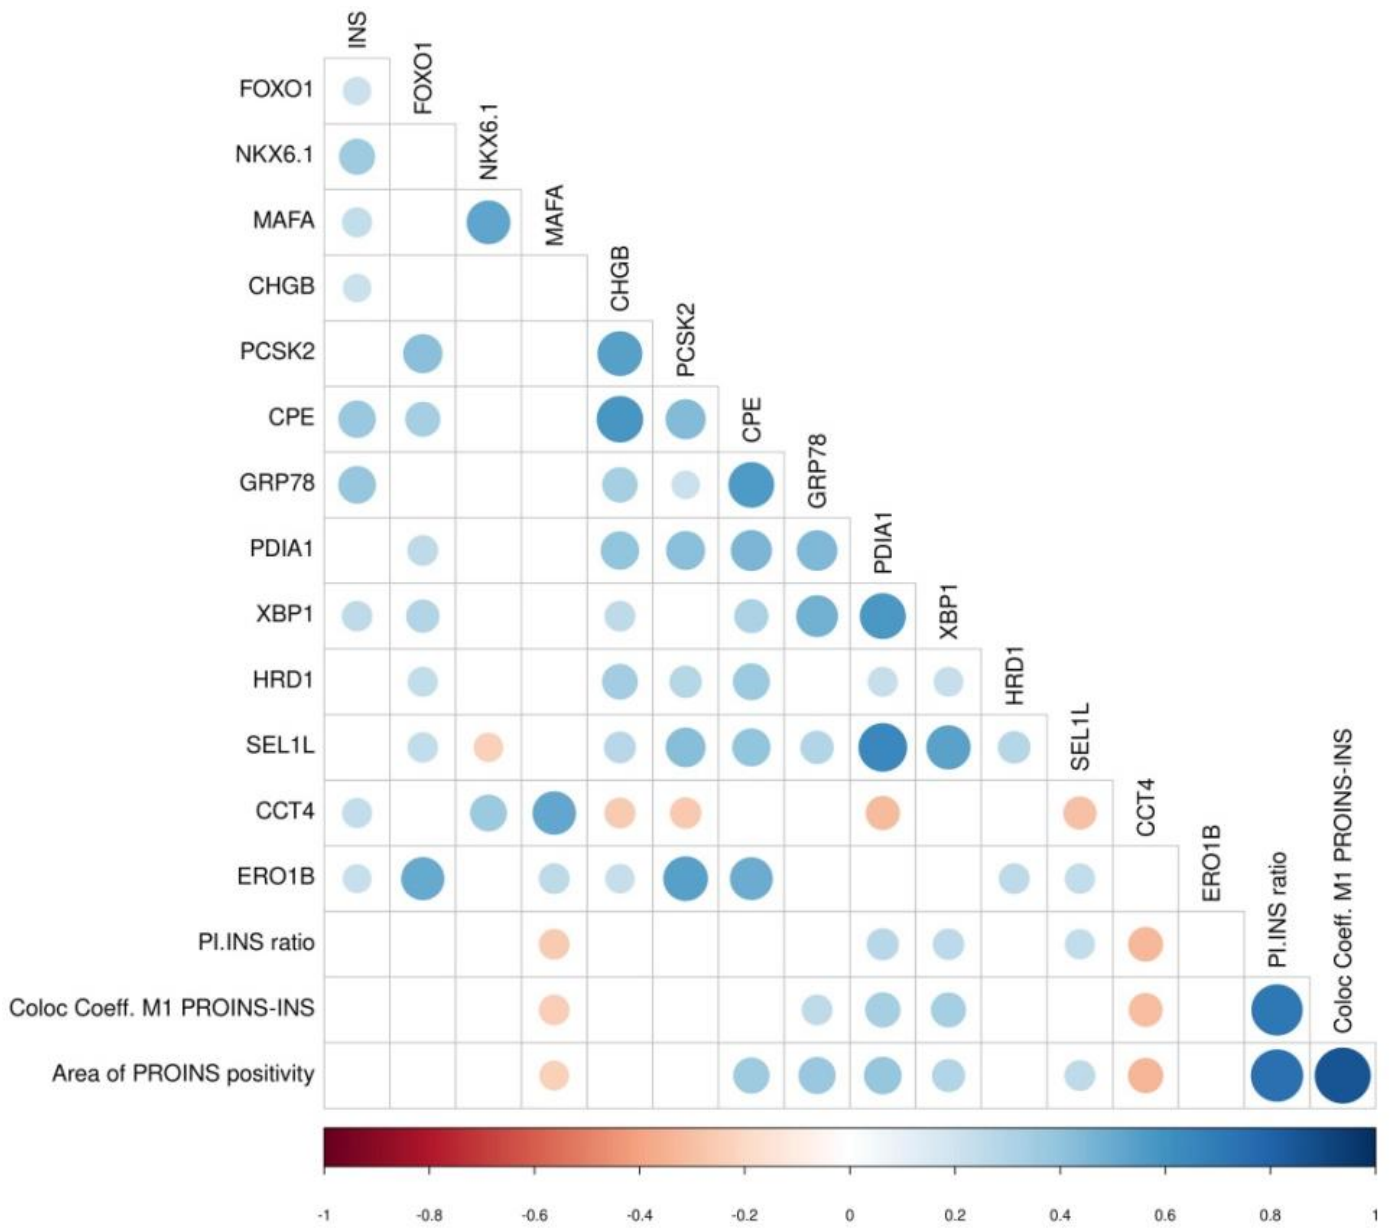

**ESM Figure 11.** Correlation matrix showing correlation coefficients among individual islet gene expression values and in situ immunofluorescence parameters associated with in situ proinsulin and insulin staining parameters. Colour key indicates the positive (dark blue) and negative (dark red) correlation  $r$ -values. The statistical significance of the Spearman  $r$  test ( $p \leq 0.05$ ) is indicated with the presence and size of blue or red dots.

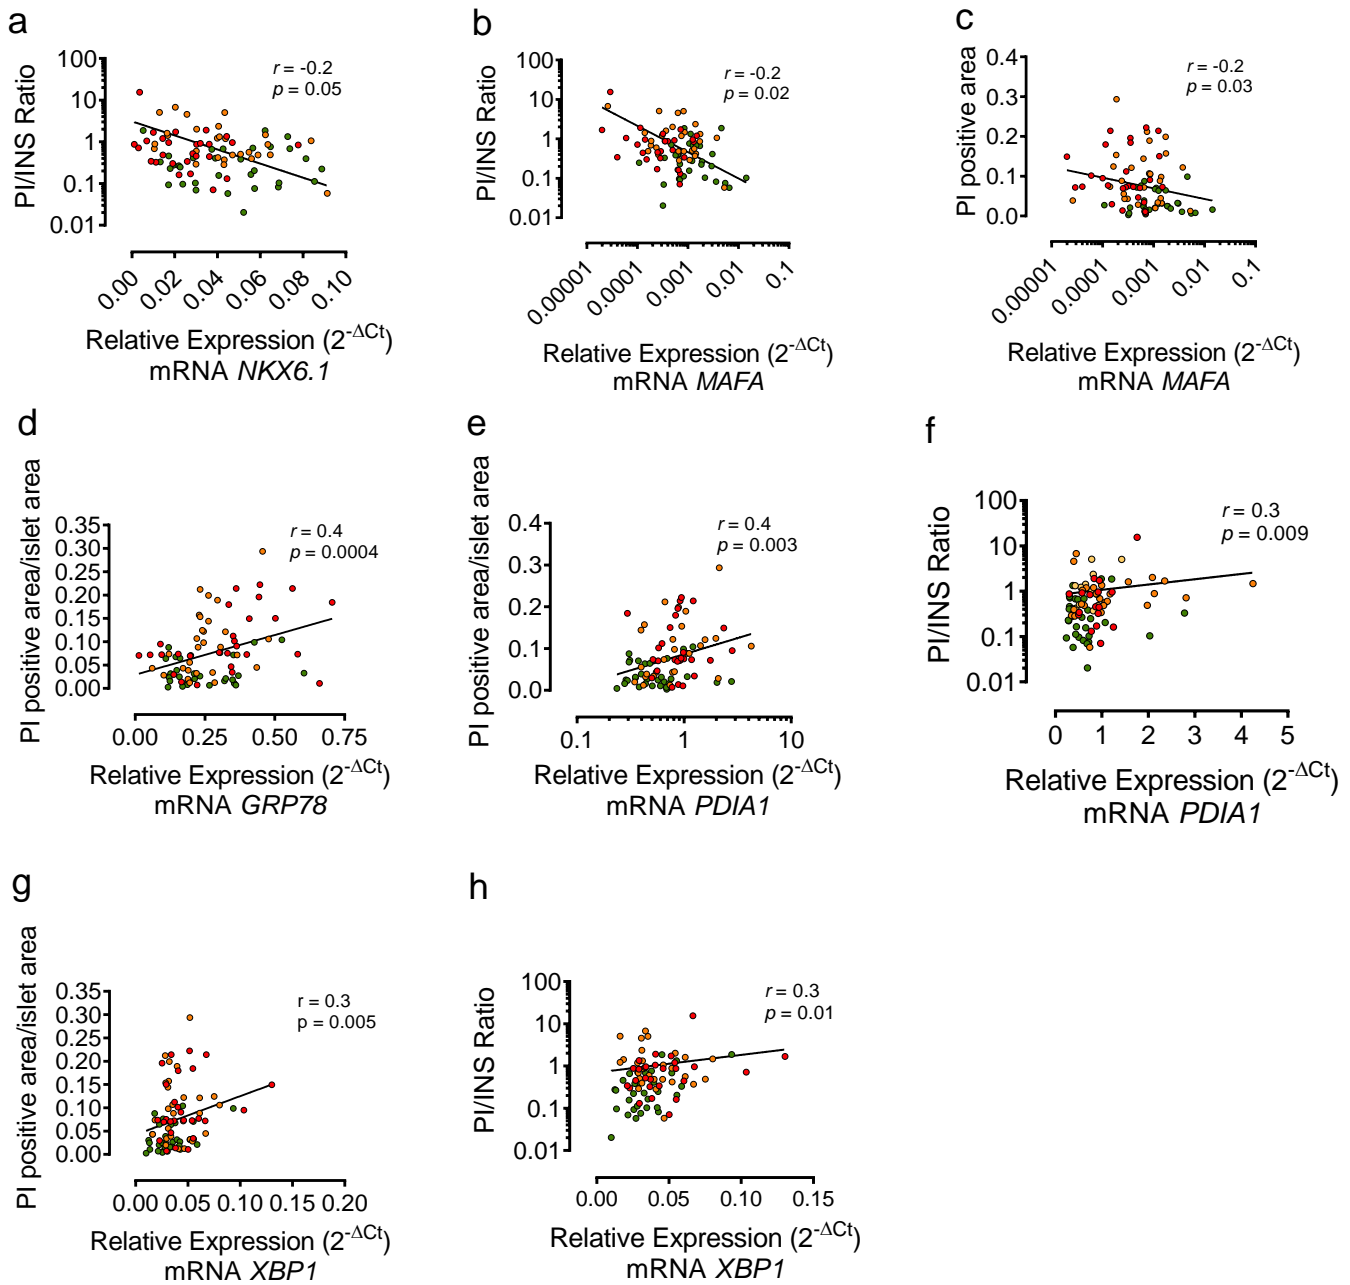

**ESM Figure 12.** Selection of scatter plots of correlation analysis shown in ESM Figure 10. Correlation among genes expression and PI and INS in situ imaging parameters measured at individual islet levels are shown.  $p$ -values and  $r$ -values were obtained using Spearman  $r$  test taking into account  $P < 0.05$ .
